# Supplementary material for: Esophageal cancer as initial presentation of Fanconi anemia in patients with a hypomorphic FANCA variant
Source: PubMed Central journal article supplement — Cold Spring Harb Mol Case Stud. 2020 Dec;6(6):a005595. doi: 10.1101/mcs.a005595 (PMC7784490; doi:10.1101/mcs.a005595), 2020-12
Supplement: supp_mcs.a005595_Supplemental_Data.pdf [file supp_mcs.a005595_Supplemental_Data.pdf]

**Esophageal cancer as initial presentation of Fanconi anemia in patients with a hypomorphic *FANCA* variant.**

Francis P. Lach<sup>\*1</sup>, Sonia Singh<sup>1,2\*^</sup>, Kimberly A. Rickman<sup>1\*</sup>, Penelope D. Ruiz<sup>1</sup>, Raymond J. Noonan<sup>1</sup>,  
Kenneth B. Hymes<sup>3</sup>, Mark D. DeLacure<sup>4,5</sup>, Jennifer Kennedy<sup>1#</sup>, Settara C. Chandrasekharappa<sup>6</sup>, Agata  
Smogorzewska<sup>1†</sup>

**Supplemental material:**

3 Supplemental Figures

2 Supplemental Tables

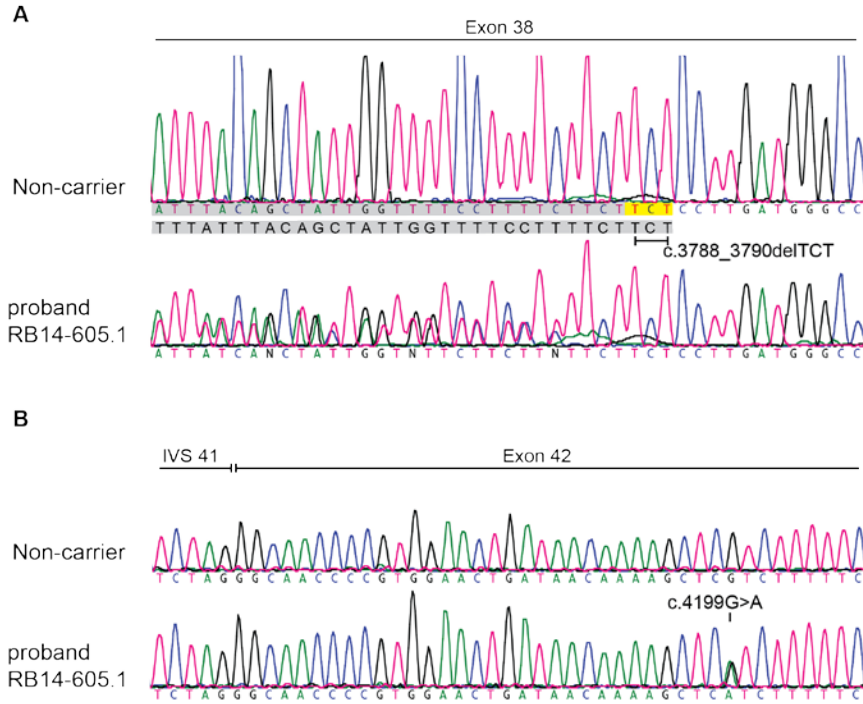

**Supplemental Figure 1.** *FANCA* Genomic Sequencing of proband's blood **A.** Genomic *FANCA* exon 38 sequencing confirming the heterozygous c.3788\_3790delTCT variant in the proband's peripheral blood. **B.** Genomic *FANCA* exon 42 sequencing confirming the heterozygous c.4199G>A variant in the proband's peripheral blood.

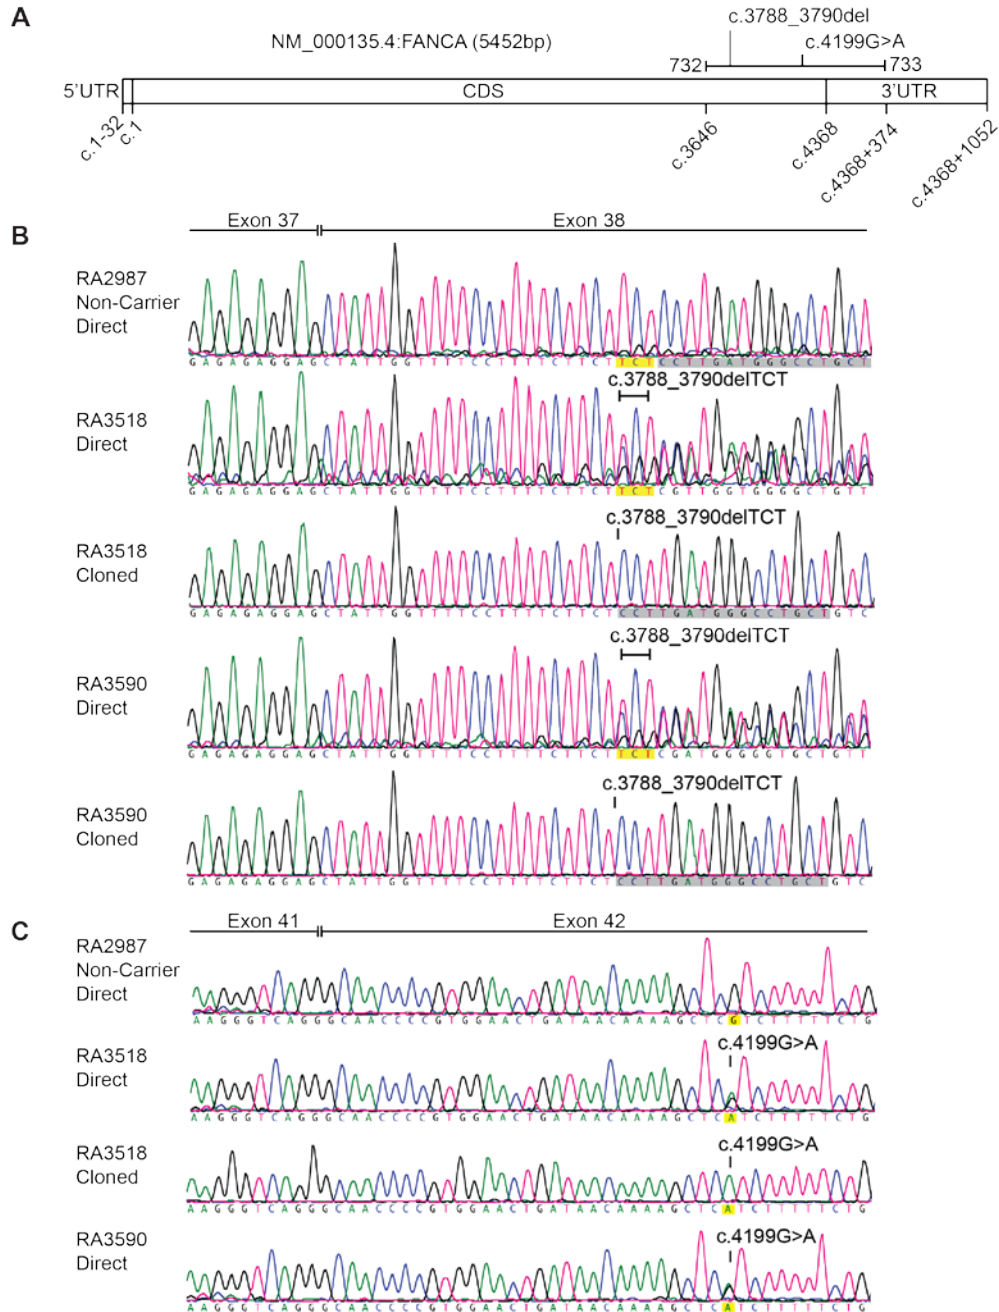

**Supplemental Figure 2.** cDNA Sequencing (direct and cloned) from RA3518 and RA3590 showing no aberrant splicing. The variants are confirmed to be *in-trans*. **A.** Mapping of partial RT-PCR product 732-733 against *FANCA* transcript (NM\_000135.4). The causal variants c.3788\_3790delTCT (exon 38) and c.4199G>A (exon 42) are nested within. The amplicon was sequenced with the end primers 732 and 733. **B.** Direct sequencing of RT-PCR and TOPO cloned (pBlunt) RT-PCR products covering the exon 37-38 splice junction and the causal c.3788\_3790delTCT variant in Exon 38 in both sibling fibroblasts RA3518 and RA3590. **C.** Direct sequencing of RT-PCR and TOPO cloned (pBlunt) RT-PCR products covering the exon 41-42 splice junction and the causal c.4199G>A variant in exon 42.

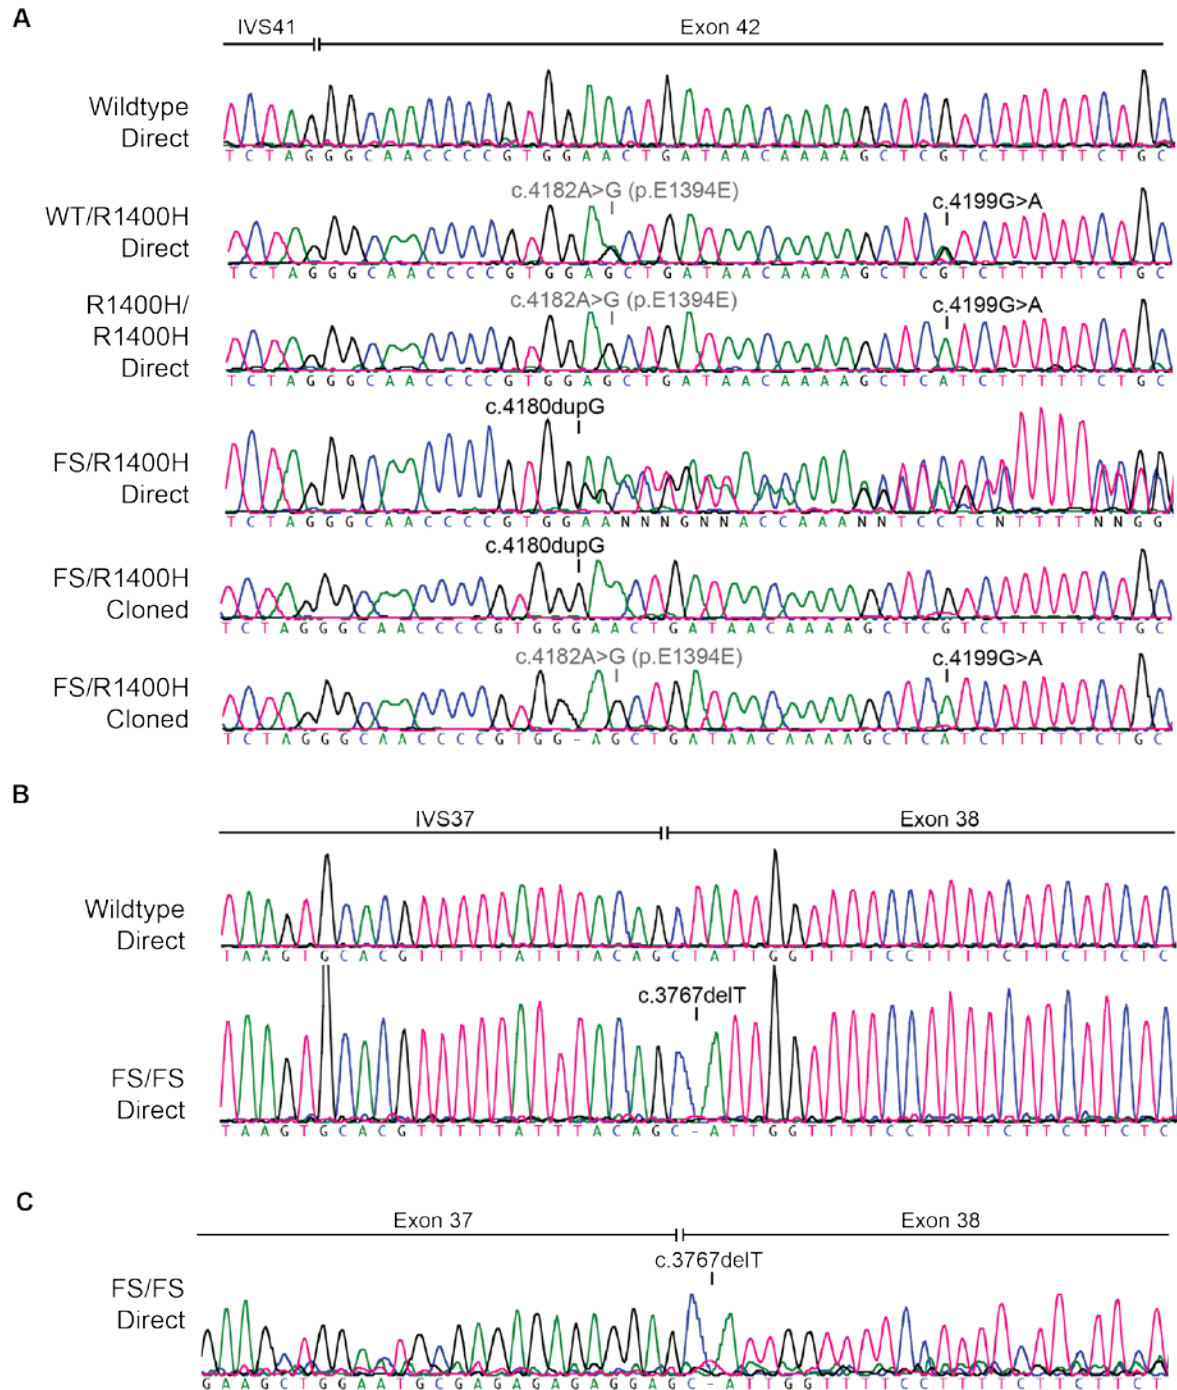

**Supplemental Figure 3.** Sequencing of the CRISPR-Cas9 mediated knock-in of *FANCA* variants. **A.** Genomic *FANCA* exon 42 sequencing illustrating successful knock-in of heterozygous, homozygous, and compound heterozygous variants in BJ E6E7/hTERT fibroblasts (direct sequencing). TOPO cloning was used to segregate the compound heterozygous alleles (Cloned). Note the silent c.4182A>G (p.E1394E) variant introduced *in-cis* with the causal c.4199G>A since the PAM site could not be mutated in this design. **B.** Genomic *FANCA* exon 38 sequencing illustrating a frameshift-causing mutation. **C.** Direct cDNA sequencing illustrating normal splicing of *FANCA* exon 37 and exon 38.

**Table S1. Genes in the CancerNext-Expanded panel from Ambry Genetics.**

|               |               |                |              |              |               |               |             |             |
|---------------|---------------|----------------|--------------|--------------|---------------|---------------|-------------|-------------|
| <i>APC</i>    | <i>ATM</i>    | <i>BARD1</i>   | <i>BRCA1</i> | <i>BRCA2</i> | <i>BRIP1</i>  | <i>BMPRIA</i> | <i>CDH1</i> | <i>CDK4</i> |
| <i>CDKN2A</i> | <i>CHEK2</i>  | <i>EPCAM</i>   | <i>FH</i>    | <i>FLCN</i>  | <i>MAX</i>    | <i>MET</i>    | <i>MITF</i> | <i>MLH1</i> |
| <i>MRE11</i>  | <i>MSH2</i>   | <i>MSH6</i>    | <i>MUTYH</i> | <i>NBN</i>   | <i>NF1</i>    | <i>PALB2</i>  | <i>PMS2</i> | <i>PTEN</i> |
| <i>RAD50</i>  | <i>RAD51C</i> | <i>RAD51D</i>  | <i>RET</i>   | <i>SDHA</i>  | <i>SDHAF2</i> | <i>SDHB</i>   | <i>SDHC</i> | <i>SDHD</i> |
| <i>SMAD4</i>  | <i>STK11</i>  | <i>TMEM127</i> | <i>TP53</i>  | <i>TSC1</i>  | <i>TSC2</i>   | <i>VHL</i>    |             |             |

**Table S2. Primers**

| Primer name                   | Purpose          | Sequence                                                                                                              |
|-------------------------------|------------------|-----------------------------------------------------------------------------------------------------------------------|
| FANCAex38F                    | gDNA PCR and SEQ | AGGATTTATGGCCTAGATGTAAAAA                                                                                             |
| FANCAex38R                    | gDNA PCR and SEQ | CTGGTGCCCTGCCTGG                                                                                                      |
| FANCAex38F_2                  | gDNA PCR and SEQ | AGTGTGAAATGACCCAGCCA                                                                                                  |
| FANCAex38F_2                  | gDNA PCR and SEQ | ACACTTCCGCAAACACAAGG                                                                                                  |
| FANCAex42F                    | gDNA PCR and SEQ | GACTATGGGGGACACACCAG                                                                                                  |
| FANCAex42R                    | gDNA PCR and SEQ | GGCTCTGGCAGAAATAGTCG                                                                                                  |
| FANCAex42F_2                  | gDNA PCR and SEQ | GCTCTTCGTGGCTGGGGATACAA                                                                                               |
| FANCAex42R_2                  | gDNA PCR and SEQ | TCGGGGCCGGACAGTTCATAAATA                                                                                              |
| FANCA nt3678_3696 Fwd         | cDNA PCR and SEQ | GCCTCCCCAGCACCCAACC                                                                                                   |
| FANCA nt4774_4754 Rvs         | cDNA PCR and SEQ | TGAAGCCCGAACCCACCTGAG                                                                                                 |
| FANCA MUT G4199A Fwd          | Mutagenesis      | TATTAAGTGCAGCAGAAAAAGATGAGCTTTTGT<br>TATCAGTTCCAC                                                                     |
| FANCA MUT G4199A Rvs          | Mutagenesis      | GTGGAAGTGCAGCAGAAAAAGCTCATCTTTTCTG<br>CTGCAGTTAATA                                                                    |
| FANCA MUT 3788_3790del Fwd    | Mutagenesis      | GGTTTTCTTTTCTTCTCCTTGATGGGCCTGCTG<br>TCG                                                                              |
| FANCA MUT 3788_3790del Rvs    | Mutagenesis      | CGACAGCAGGCCCATCAAGGAGAAGAAAAGGA<br>AAACC                                                                             |
| FANCA c.4199G>A KI DONOR ssDN | CRISPR           | T*G*A*GAAGCTCTTTTTCGGGCACCGAGGTATT<br>AACTGCAGCAGAAAAAGATGAGCTTTTGTATC<br>AGCTCCACGGGGTTGCCCTAGAGAGAAAACAG<br>G*C*A*A |

|                               |        |                      |
|-------------------------------|--------|----------------------|
| SG1<br>FANCAex38<br>GUIDE RNA | CRISPR | ACGTTTTTATTTACAGCTAT |
| SG2<br>FANCAex42<br>GUIDE RNA | CRISPR | GCTTTTGTATCAGCTCCAC  |
